# Supplementary material for: Temperature dependence of spontaneous mutation rates
Source: HighWire-hosted journal article supplement (doi:10.1101/gr.275168.120), 2021-07-23
Supplement: Supplemental_Data_1.xlsx [file Supplemental_Data_1.xlsx]

## Sheet: legend
Waldvogel & Pfenninger: Temperature dependence of spontaneous mutation rates
Supplemental Data 1: Deatiled lists of de novo mutations
sheets
mutation rates	data per replicate all temperatures, calculation of rates
mutator lines	data and rates per mutator line
12C	positions and details of de novo mutations in 12°C MAL
14C	positions and details of de novo mutations in 14°C MAL
20C	positions and details of de novo mutations in 20°C MAL
23C_nonmutators	positions and details of de novo mutations in 23°C MAL (excluding mutations from mutator lines)
26C	positions and details of de novo mutations in 26°C MAL

## Sheet: mutation rates
µ (diploid) at different temperatures													temperature mean
temperature	sample name	generations	mean coverage	callable sites	mutations_total	SNM	insertion	deletion	µ total	µ SNM	µ insertions	µ deletions	µ total	µ SNM	µ insertions	µ deletions
12	F1	2	26.45	98630971	5	4	0	1	2.5347e-08	2.02776e-08	0	5.0694e-09	1.61215e-08	1.40865e-08	1.01858e-09	1.01643e-09
12	F2	2	22.8	91438852	0	0	0	0	0	0	0	0
12	F3	2	21.87	91733885	3	2	1	0	1.63516e-08	1.09011e-08	5.45055e-09	0
12	F4	2	26	100807765	0	0	0	0	0	0	0	0
12	F5	2	25.94	78477092	3	3	0	0	1.91139e-08	1.91139e-08	0	0
12	F6	2	21.35	91975558	1	1	0	0	5.43623e-09	5.43623e-09	0	0
12	F7	2	20.22	42868282	3	3	0	0	3.49909e-08	3.49909e-08	0	0
12	F8	2	22.53	92141904	3	3	0	0	1.62792e-08	1.62792e-08	0	0
12	F9	2	24.28	98137079	3	2	0	1	1.52847e-08	1.01898e-08	0	5.09491e-09
12	F10	2	28.29	105590287	6	5	1	0	2.84117e-08	2.36764e-08	4.73528e-09	0
14	B1	4	26.44	131490973	49	49	0	0	9.31623e-08	9.31623e-08	0	0	4.6885e-09	3.84751e-09	8.40997e-10	0
14	B5	2	15.2	64767390	0	0	0	0	0	0	0	0
14	B6	4	16.58	81221405	5	5	0	0	1.539e-08	1.539e-08	0	0
14	B7	2	16.63	48275738	0	0	0	0	0	0	0	0
14	B8	3	18.6	99088770	1	0	1	0	3.36399e-09	0	3.36399e-09	0
17	C1	5	23.34	115401919	0	0	0	0	0	0	0	0	5.55266e-09	4.37364e-09	4.16626e-10	7.62388e-10
17	C2	5	26.11	97922761	4	4	0	0	8.1697e-09	8.1697e-09	0	0
17	C7	5	21.5	100457747	0	0	0	0	0	0	0	0
17	C8	5	25.57	131748726	6	4	1	1	9.10825e-09	6.07216e-09	1.51804e-09	1.51804e-09
17	C11	5	20.06	89820970	3	3	0	0	6.67995e-09	6.67995e-09	0	0
17	C12	5	20.66	89621926	6	5	1	0	1.33896e-08	1.1158e-08	2.2316e-09	0
17	C13	5	28.17	124893543	2	1	0	1	3.20273e-09	1.60136e-09	0	1.60136e-09
17	C14	5	23.54	108212655	1	0	0	1	1.84821e-09	0	0	1.84821e-09
17	C15	5	21.8	105603483	4	3	0	1	7.57551e-09	5.68163e-09	0	1.89388e-09
20	A1	5	21.5	113236130	11	7	4	0	1.94284e-08	1.23635e-08	7.06488e-09	0	8.39468e-09	6.71337e-09	1.1981e-09	4.83216e-10
20	A2	5	24.98	129665170	2	2	0	0	3.08487e-09	3.08487e-09	0	0
20	A3	5	23.82	127096967	14	13	1	0	2.20304e-08	2.04568e-08	1.5736e-09	0
20	A4	5	22.1	119669200	4	2	2	0	6.6851e-09	3.34255e-09	3.34255e-09	0
20	A5	5	24.29	108359345	4	3	0	1	7.38284e-09	5.53713e-09	0	1.84571e-09
20	A6	5	26.95	133971013	2	1	0	1	2.98572e-09	1.49286e-09	0	1.49286e-09
20	A7	5	25.43	131647254	0	0	0	0	0	0	0	0
20	A8	5	27.97	133905222	11	10	0	1	1.64295e-08	1.49359e-08	0	1.49359e-09
20	A9	5	27.1	135193536	3	3	0	0	4.43808e-09	4.43808e-09	0	0
20	A10	5	27.56	134965917	1	1	0	0	1.48186e-09	1.48186e-09	0	0
23	D1	5	23.28	72517915	5	5	0	0	1.37897e-08	1.37897e-08	0	0	1.31947e-08	1.22739e-08	6.24615e-10	2.96131e-10
23	D10	5	24.59	96482429	7	6	0	1	1.45104e-08	1.24375e-08	0	2.07292e-09
23	D11	4	24.69	98272499	8	8	0	0	2.03516e-08	2.03516e-08	0	0
23	D12	5	23.78	109515557	3	3	0	0	5.47867e-09	5.47867e-09	0	0
23	D2	5	20.78	98166612	2	1	1	0	4.07471e-09	2.03735e-09	2.03735e-09	0
23	D7	5	26.71	89821292	8	8	0	0	1.78131e-08	1.78131e-08	0	0
23	D9	4	25.96	107068662	7	6	1	0	1.63447e-08	1.40097e-08	2.33495e-09	0
23	D3	4	23.43	81960365	42258	42258	0	0	0.000128898	0.000128898	0	0
23	D4	5	24.78	70695959	34319	34319	0	0	9.7089e-05	9.7089e-05	0	0
23	D8	5	23.22	75849074	29304	17058	6064	6182	7.72692e-05	4.49788e-05	1.59896e-05	1.63008e-05
26	E1-2	2	24.9	93596162	1	0	1	0	5.3421e-09	0	5.3421e-09	0	2.73344e-08	2.452e-08	1.41238e-09	1.40203e-09
26	E1-3	2	23.55	95777840	2	2	0	0	1.04408e-08	1.04408e-08	0	0
26	E1-4	2	12.57	43379410	7	6	0	1	8.06834e-08	6.91572e-08	0	1.15262e-08
26	E1-5	2	23.06	87620628	2	2	0	0	1.14128e-08	1.14128e-08	0	0
26	E1-6	2	27.03	84362282	2	2	0	0	1.18536e-08	1.18536e-08	0	0
26	E1-8	2	27.6	77632512	3	2	1	0	1.93218e-08	1.28812e-08	6.4406e-09	0		1.28616
26	E1-9	2	23.02	75907492	1	1	0	0	6.58697e-09	6.58697e-09	0	0
26	E2-11	2	23.03	86728530	18	18	0	0	1.03772e-07	1.03772e-07	0	0
26	E2-12	2	18.57	64574609	6	6	0	0	4.64579e-08	4.64579e-08	0	0
26	E2-13	2	23.91	78743775	3	3	0	0	1.90491e-08	1.90491e-08	0	0
26	E2-14	2	27.79	89574976	5	5	0	0	2.79096e-08	2.79096e-08	0	0
26	E2-3	2	23.67	80797535	7	7	0	0	4.33182e-08	4.33182e-08	0	0
26	E2-4	2	28.93	76007467	6	5	1	0	3.94698e-08	3.28915e-08	6.5783e-09	0
26	E2-9	2	22.64	74624972	5	4	0	1	3.35009e-08	2.68007e-08	0	6.70017e-09
					50

## Sheet: mutator lines
mutator lines													mean
temperature	sample name	generations	callable sites	mutations_total	SNM	insertion	deletion	µ total	µ SNM	µ insertions	µ deletions	rate increase	µ total	µ SNM	µ insertions	µ deletions
14	B1	4	131490973	49	49	0	0	9.31623e-08	9.31623e-08	0	0	19.8704	6.06906e-05	5.42325e-05	3.19793e-06	3.26016e-06
23	D3	4	81960365	42258	42258	0	0	0.000128898	0.000128898	0	0	9768.9
23	D4	5	70695959	34319	34319	0	0	9.7089e-05	9.7089e-05	0	0	7358.18
23	D8	5	75849074	29304	17058	6064	6182	7.72692e-05	4.49788e-05	1.59896e-05	1.63008e-05	5856.08
26	E2-11	2	86728530	18	18	0	0	1.03772e-07	1.03772e-07	0	0	4.23215

## Sheet: 12C
method	scaffold	position	mutation type	sample	ref allel	mutation	coverage		counts
probabilistic	Crip3.0_scaffold112	470600	SNM	F10	A	AA->AG	200	TS	SNM	23
statistical	Crip3.0_scaffold118	71683	SNM	F6	A	A/G	23	TS	insertion	2
probabilistic	Crip3.0_scaffold127	869358	SNM	F10	C	CC->AC	197	TV	deletion	2
probabilistic	Crip3.0_scaffold152	528633	SNM	F10	T	TT->CT	231	TS	transitions	17
probabilistic	Crip3.0_scaffold16	58943	SNM	F1	A	AA->AG	166	TS	transversions	6
probabilistic	Crip3.0_scaffold168	459306	SNM	F8	T	TT->CT	215	TS
probabilistic	Crip3.0_scaffold171	191630	SNM	F1	T	TT->CT	181	TS
stat/prob	Crip3.0_scaffold183	473936	SNM	F8	A	AA->AT	275	TV
probabilistic	Crip3.0_scaffold237	366661	SNM	F7	C	CC->AC	180	TV
probabilistic	Crip3.0_scaffold272	689354	SNM	F10	T	TT->AT	191	TV
probabilistic	Crip3.0_scaffold286	107472	SNM	F3	A	AA->AG	253	TS
statistical	Crip3.0_scaffold31	314668	deletion	F1	CT	CT/C	29
probabilistic	Crip3.0_scaffold33	1264837	SNM	F7	G	GG->AG	176	TS
probabilistic	Crip3.0_scaffold346	38554	SNM	F5	C	CC->CT	181	TS
probabilistic	Crip3.0_scaffold35	299263	SNM	F9	T	TT->CT	258	TS
statistical	Crip3.0_scaffold393	700572	insertion	F10	C	C/CT	38
probabilistic	Crip3.0_scaffold418	106405	SNM	F3	C	CG->AC	321	TS
probabilistic	Crip3.0_scaffold479	37829	SNM	F9	A	AA->AG	390	TS
probabilistic	Crip3.0_scaffold512	84037	SNM	F5	T	TT->CT	189	TS
probabilistic	Crip3.0_scaffold541	50813	SNM	F7	T	TT->CT	299	TS
statistical	Crip3.0_scaffold620	15079	SNM	F1	C	C/T	15	TS
stat/prob	Crip3.0_scaffold622	111369	SNM	F8	C	CC->CG	243	TV
statistical	Crip3.0_scaffold624	287837	SNM	F1	T	T/C	33	TS
statistical	Crip3.0_scaffold649	590121	insertion	F3	A	A/AG	22
statistical	Crip3.0_scaffold699	369970	deletion	F9	CA	CA/C	19
statistical	Crip3.0_scaffold741	647008	SNM	F5	T	T/A	24	TV
statistical	Crip3.0_scaffold91	131414	SNM	F10	T	T/C	22	TS

## Sheet: 14C
method	scaffold	position	mutation type	sample	ref allel	mutation	coverage		counts
probabilistic	Crip3.0_scaffold108	15626	SNM	B1	G	GG->AA	114	TS	SNM	5
probabilistic	Crip3.0_scaffold11	479916	SNM	B1	G	GG->AG	91	TS	insertion	1
probabilistic	Crip3.0_scaffold110	789345	SNM	B1	C	CC->TT	96	TS	deletion	0
probabilistic	Crip3.0_scaffold148	466417	SNM	B1	T	TT->GG	109	TV	transitions	3
probabilistic	Crip3.0_scaffold149	142517	SNM	B1	A	AA->TT	122	TV	transversions	2
statistical	Crip3.0_scaffold156	41152	SNM	B1	A	A/G	31	TS
probabilistic	Crip3.0_scaffold156	736935	SNM	B1	A	AA->GG	126	TS
probabilistic	Crip3.0_scaffold170	489244	SNM	B1	G	GG->TT	120	TV
probabilistic	Crip3.0_scaffold227	166158	SNM	B1	A	AA->GG	94	TS
probabilistic	Crip3.0_scaffold279	714150	SNM	B1	T	TT->CC	109	TS
probabilistic	Crip3.0_scaffold298	53403	SNM	B1	T	TT->AA	91	TV
probabilistic	Crip3.0_scaffold33	2165674	SNM	B1	G	GG->AA	95	TS
probabilistic	Crip3.0_scaffold346	57814	SNM	B1	C	CC->TT	91	TS
probabilistic	Crip3.0_scaffold35	292657	SNM	B1	G	GG->AA	113	TS
probabilistic	Crip3.0_scaffold360	53165	SNM	B1	T	TT->AA	109	TV
probabilistic	Crip3.0_scaffold360	376440	SNM	B1	T	TT->AA	103	TV
probabilistic	Crip3.0_scaffold372	488036	SNM	B1	T	TT->AA	113	TV
probabilistic	Crip3.0_scaffold376	763155	SNM	B1	T	TT->AA	95	TV
probabilistic	Crip3.0_scaffold376	812783	SNM	B1	T	TT->AA	100	TV
probabilistic	Crip3.0_scaffold426	655740	SNM	B1	A	AA->TT	102	TV
probabilistic	Crip3.0_scaffold460	298506	SNM	B1	A	AA->CC	98	TV
probabilistic	Crip3.0_scaffold460	336290	SNM	B1	A	AA->AT	116	TV
probabilistic	Crip3.0_scaffold460	408463	SNM	B1	T	CT->AC	95	TV
probabilistic	Crip3.0_scaffold460	801865	SNM	B1	C	CC->TT	101	TS
probabilistic	Crip3.0_scaffold460	812707	SNM	B1	T	TT->CT	129	TS
probabilistic	Crip3.0_scaffold518	412795	SNM	B1	T	TT->CC	102	TS
probabilistic	Crip3.0_scaffold546	41940	SNM	B1	A	AA->CC	92	TV
probabilistic	Crip3.0_scaffold547	154536	SNM	B1	A	AA->AT	151	TV
probabilistic	Crip3.0_scaffold548	177825	SNM	B1	T	TT->AA	91	TV
probabilistic	Crip3.0_scaffold552	412411	SNM	B1	G	GG->CC	106	TV
probabilistic	Crip3.0_scaffold554	250895	SNM	B1	G	GG->TT	102	TV
probabilistic	Crip3.0_scaffold607	314705	SNM	B1	T	TT->CT	123	TS
probabilistic	Crip3.0_scaffold609	94455	SNM	B1	G	GG->TT	128	TV
probabilistic	Crip3.0_scaffold61	592106	SNM	B1	T	TT->AA	101	TV
probabilistic	Crip3.0_scaffold612	259049	SNM	B1	A	AA->AG	134	TS
probabilistic	Crip3.0_scaffold717	423459	SNM	B1	T	TT->GG	99	TV
probabilistic	Crip3.0_scaffold717	438566	SNM	B1	T	TT->AA	93	TV
probabilistic	Crip3.0_scaffold717	710244	SNM	B1	T	TT->CC	108	TS
probabilistic	Crip3.0_scaffold746	107744	SNM	B1	A	AA->GG	110	TS
probabilistic	Crip3.0_scaffold746	242789	SNM	B1	A	AA->CC	102	TV
probabilistic	Crip3.0_scaffold81	1242102	SNM	B1	A	AA->GG	121	TS
probabilistic	Crip3.0_scaffold85	229649	SNM	B1	A	AA->AT	112	TV
probabilistic	Crip3.0_scaffold85	343214	SNM	B1	A	AA->TT	90	TV
probabilistic	Crip3.0_scaffold9	670166	SNM	B1	C	CC->TT	100	TS
probabilistic	Crip3.0_scaffold94	75913	SNM	B1	T	TT->AA	124	TV
probabilistic	Crip3.0_scaffold94	107461	SNM	B1	A	AA->TT	116	TV
probabilistic	Crip3.0_scaffold94	364961	SNM	B1	T	TT->AT	150	TV
probabilistic	Crip3.0_scaffold94	401284	SNM	B1	C	CC->TT	114	TS
probabilistic	Crip3.0_scaffold95	791412	SNM	B1	C	CC->TT	100	TS
probabilistic	Crip3.0_scaffold132	31415	SNM	B6	T	GG->TT	102	TV
probabilistic	Crip3.0_scaffold278	6455	SNM	B6	C	TT->CC	120	TS
probabilistic	Crip3.0_scaffold506	177213	SNM	B6	T	CC->TT	90	TS
probabilistic	Crip3.0_scaffold61	382127	SNM	B6	A	GG->AA	102	TS
probabilistic	Crip3.0_scaffold635	340378	SNM	B6	A	CC->AA	145	TV
statistical	Crip3.0_scaffold699	361867	insertion	B8	A	A/AT	20

## Sheet: 17C
method	scaffold	position	mutation type	sample	ref allel	mutation	coverage		counts
stat/prob	Crip3.0_scaffold106	14487	SNM	C12	C	CC->CT	369	TS	SNM	20
statistical	Crip3.0_scaffold112	559155	SNM	C12	A	A/G	29	TV	insertion	2
probabilistic	Crip3.0_scaffold135	421649	SNM	C15	G	GG->TT	432	TV	deletion	4
probabilistic	Crip3.0_scaffold157	236442	SNM	C12	A	AA->AT	336	TV	transitions	5
probabilistic	Crip3.0_scaffold17	620838	SNM	C8	G	GG->AA	162	TV	transversions	15
statistical	Crip3.0_scaffold172	41788	SNM	C12	G	G/T	38	TV
statistical	Crip3.0_scaffold181	158221	insertion	C8	A	A/ATT	21
stat/prob	Crip3.0_scaffold211	54666	SNM	C15	G	GG->CG	327	TV
probabilistic	Crip3.0_scaffold227	32524	SNM	C8	C	CC->CT	333	TS
probabilistic	Crip3.0_scaffold249	63065	SNM	C2	A	AA->TT	336	TV
stat/prob	Crip3.0_scaffold294	11365	SNM	C2	C	CC->CG	423	TV
probabilistic	Crip3.0_scaffold349	137780	SNM	C2	A	AA->TT	177	TV
stat/prob	Crip3.0_scaffold376	374278	SNM	C2	A	AA->AT	437	TV
statistical	Crip3.0_scaffold463	38161	deletion	C8	CA	CA/C	29
statistical	Crip3.0_scaffold477	214786	deletion	C13	CCT	CCT/C	21
probabilistic	Crip3.0_scaffold506	54778	SNM	C11	T	TT->AT	360	TV
statistical	Crip3.0_scaffold517	101664	insertion	C12	G	G/GA	23
statistical	Crip3.0_scaffold575	41137	SNM	C8	C	C/A	40	TV
statistical	Crip3.0_scaffold576	433404	SNM	C8	C	C/T	28	TV
statistical	Crip3.0_scaffold637	210955	SNM	C11	A	A/G	35	TS
stat/prob	Crip3.0_scaffold655	25024	SNM	C13	C	CC->CG	207	TV
statistical	Crip3.0_scaffold663	187930	deletion	C14	TC	TC/T	30
statistical	Crip3.0_scaffold698	274508	SNM	C11	T	T/C	19	TS
statistical	Crip3.0_scaffold708	195845	deletion	C15	GTC	GTC/G	29
probabilistic	Crip3.0_scaffold85	551031	SNM	C12	G	GG->GT	422	TV
statistical	Crip3.0_scaffold9	528594	SNM	C15	A	A/G	33	TS

## Sheet: 20C
method	scaffold	position	mutation type	sample	ref allel	mutation	coverage		counts
probabilistic	Crip3.0_scaffold135	223320	SNM	A1	T	TT->AA	165	TV	SNM	42
probabilistic	Crip3.0_scaffold148	63531	SNM	A1	C	CC->CG	329	TV	insertion	7
probabilistic	Crip3.0_scaffold237	500931	SNM	A1	T	TT->AA	264	TV	deletion	3
statistical	Crip3.0_scaffold246	1017188	insertion	A1	TTA	T/TTA	16		transitions	16
statistical	Crip3.0_scaffold262	238216	insertion	A1	GA	G/GA	21		transversions	26
probabilistic	Crip3.0_scaffold263	14063	SNM	A1	G	GG->TT	263	TV
stat/prob	Crip3.0_scaffold477	275419	SNM	A1	C	CC->CT	401	TS
probabilistic	Crip3.0_scaffold518	643339	SNM	A1	T	TT->CT	167	TV
statistical	Crip3.0_scaffold673	252246	insertion	A1	TA	T/TA	23
statistical	Crip3.0_scaffold699	361867	insertion	A1	AT	A/AT	20
probabilistic	Crip3.0_scaffold9	8634	SNM	A1	G	GG->GT	307	TV
stat/prob	Crip3.0_scaffold279	692915	SNM	A10	G	GG->AG	352	TS
stat/prob	Crip3.0_scaffold101	1379183	SNM	A2	T	TT->AT	289	TV
probabilistic	Crip3.0_scaffold718	934159	SNM	A2	G	GG->AG	396	TS
probabilistic	Crip3.0_scaffold108	15624	SNM	A3	T	TT->CC	305	TS
probabilistic	Crip3.0_scaffold110	135240	SNM	A3	G	GG->CC	364	TV
probabilistic	Crip3.0_scaffold117	172620	SNM	A3	A	AA->GG	255	TS
probabilistic	Crip3.0_scaffold117	202777	SNM	A3	T	TT->GG	353	TV
probabilistic	Crip3.0_scaffold154	505751	SNM	A3	A	AA->TT	328	TV
statistical	Crip3.0_scaffold168	761672	insertion	A3	GT	GT/GT	43
probabilistic	Crip3.0_scaffold33	2137164	SNM	A3	T	TT->AA	262	TV
probabilistic	Crip3.0_scaffold33	2192482	SNM	A3	T	TT->AA	211	TV
probabilistic	Crip3.0_scaffold33	2278713	SNM	A3	T	TT->CC	181	TS
probabilistic	Crip3.0_scaffold33	2376340	SNM	A3	A	AA->TT	340	TV
probabilistic	Crip3.0_scaffold401	274961	SNM	A3	A	AA->GG	242	TS
probabilistic	Crip3.0_scaffold426	582860	SNM	A3	A	AA->TT	416	TV
probabilistic	Crip3.0_scaffold426	729209	SNM	A3	G	GG->TT	295	TV
probabilistic	Crip3.0_scaffold660	98424	SNM	A3	T	TT->AT	383	TV
stat/prob	Crip3.0_scaffold157	147886	SNM	A4	T	TT->CT	335	TS
statistical	Crip3.0_scaffold227	181179	insertion	A4	AT	A/AT	24
statistical	Crip3.0_scaffold94	657836	insertion	A4	AT	A/AT	19
stat/prob	Crip3.0_scaffold95	364280	SNM	A4	A	AA->AG	392	TS
probabilistic	Crip3.0_scaffold158	707671	SNM	A5	A	AA->TT	253	TV
probabilistic	Crip3.0_scaffold216	86764	SNM	A5	C	CC->AA	391	TV
probabilistic	Crip3.0_scaffold622	163057	SNM	A5	C	CC->AC	300	TV
statistical	Crip3.0_scaffold9	298544	deletion	A5	T	TC/T	29
statistical	Crip3.0_scaffold1	243009	SNM	A6	C	T/C	22	TS
statistical	Crip3.0_scaffold101	979386	deletion	A6	A	AC/A	18
statistical	Crip3.0_scaffold154	460577	deletion	A8	G	GT/G	41
probabilistic	Crip3.0_scaffold194	4624	SNM	A8	A	AC->AT	168	TV
probabilistic	Crip3.0_scaffold194	5108	SNM	A8	G	GG->AG	178	TS
probabilistic	Crip3.0_scaffold194	8122	SNM	A8	G	GG->CG	176	TV
probabilistic	Crip3.0_scaffold194	8458	SNM	A8	G	GG->AG	180	TS
stat/prob	Crip3.0_scaffold227	252931	SNM	A8	G	GG->AG	281	TS
probabilistic	Crip3.0_scaffold372	244487	SNM	A8	G	CG->AG	168	TS
probabilistic	Crip3.0_scaffold61	864996	SNM	A8	G	GG->AG	168	TS
probabilistic	Crip3.0_scaffold673	1644128	SNM	A8	A	AC->AT	167	TV
probabilistic	Crip3.0_scaffold757	382511	SNM	A8	T	TT->AT	319	TV
statistical	Crip3.0_scaffold95	860223	SNM	A8	A	C/A	19	TV
probabilistic	Crip3.0_scaffold128	115155	SNM	A9	C	CC->AA	195	TV
statistical	Crip3.0_scaffold204	12397	SNM	A9	G	A/G	21	TS
statistical	Crip3.0_scaffold453	109665	SNM	A9	A	T/A	40	TV

## Sheet: 23C_nonmutators
method	scaffold	position	mutation type	sample	ref allel	mutation	coverage		counts
statistical	Crip3.0_scaffold101	393526	SNM	D1	A	A/G	27	TS	SNM	37
probabilistic	Crip3.0_scaffold118	396277	SNM	D9	C	CC->CT	175	TV	insertion	2
statistical	Crip3.0_scaffold12	3154	SNM	D11	G	G/A	36	TS	deletion	1
stat/prob	Crip3.0_scaffold12	94038	SNM	D11	G	GG->AG	462	TS	transitions	25
probabilistic	Crip3.0_scaffold129	707237	SNM	D11	A	AA->AG	222	TS	transversions	12
probabilistic	Crip3.0_scaffold150	60914	SNM	D10	C	CC->CT	267	TS
probabilistic	Crip3.0_scaffold168	845398	SNM	D7	A	AA->AG	270	TS
probabilistic	Crip3.0_scaffold197	202318	SNM	D10	A	AA->TT	170	TV
probabilistic	Crip3.0_scaffold204	317551	SNM	D11	A	AA->AG	459	TS
statistical	Crip3.0_scaffold227	402717	SNM	D2	G	G/A	17	TS
probabilistic	Crip3.0_scaffold246	823116	SNM	D10	C	CC->AA	346	TV
probabilistic	Crip3.0_scaffold259	80375	SNM	D9	A	AA->AG	253	TS
probabilistic	Crip3.0_scaffold270	30634	SNM	D11	T	TT->CT	165	TS
probabilistic	Crip3.0_scaffold33	2093541	SNM	D7	A	AA->GG	206	TS
probabilistic	Crip3.0_scaffold332	213552	SNM	D7	C	CC->CT	367	TS
probabilistic	Crip3.0_scaffold340	324926	SNM	D7	C	CC->CT	268	TS
statistical	Crip3.0_scaffold376	797649	SNM	D1	G	G/T	25	TV
probabilistic	Crip3.0_scaffold398	433923	SNM	D7	T	TT->CT	176	TS
probabilistic	Crip3.0_scaffold4	81235	SNM	D9	T	TT->CT	243	TS
statistical	Crip3.0_scaffold402	36976	SNM	D10	C	C/T	35	TS
statistical	Crip3.0_scaffold41	147662	SNM	D10	T	T/C	44	TS
stat/prob	Crip3.0_scaffold426	649973	SNM	D11	G	GG->CG	236	TV
probabilistic	Crip3.0_scaffold456	174366	SNM	D9	T	TT->AT	217	TV
statistical	Crip3.0_scaffold483	38481	insertion	D9	C	C/CAA	24
statistical	Crip3.0_scaffold500	183692	insertion	D2	G	G/GA	32
stat/prob	Crip3.0_scaffold527	131016	SNM	D12	A	AA->AT	408	TV
statistical	Crip3.0_scaffold528	15894	SNM	D10	C	C/A	25	TV
probabilistic	Crip3.0_scaffold54	180421	SNM	D1	A	AA->GG	178	TS
stat/prob	Crip3.0_scaffold557	712731	SNM	D11	C	CC->CT	386	TS
statistical	Crip3.0_scaffold567	49138	deletion	D10	GTA	GTA/G	25
probabilistic	Crip3.0_scaffold625	178703	SNM	D7	T	TT->CT	195	TS
probabilistic	Crip3.0_scaffold64	41207	SNM	D7	G	GG->TT	207	TV
probabilistic	Crip3.0_scaffold649	360020	SNM	D1	A	AA->AT	260	TV
probabilistic	Crip3.0_scaffold668	208365	SNM	D1	G	GG->CG	444	TV
probabilistic	Crip3.0_scaffold671	259639	SNM	D9	T	TT->CT	167	TS
probabilistic	Crip3.0_scaffold71	9951	SNM	D7	T	TT->CT	215	TS
stat/prob	Crip3.0_scaffold737	140902	SNM	D12	T	TT->AT	412	TV
statistical	Crip3.0_scaffold85	737214	SNM	D12	A	A/G	18	TS
stat/prob	Crip3.0_scaffold86	925500	SNM	D11	C	CC->CT	497	TS
probabilistic	Crip3.0_scaffold9	1007642	SNM	D9	T	TT->CT	182	TS

## Sheet: 26C
method	scaffold	position	mutation type	sample	ref allel	mutation	coverage		counts
statistical	Crip3.0_scaffold481	390094	insertion	E1-2	A	A/AT	21		SNM	45
probabilistic	Crip3.0_scaffold312	414543	SNM	E1-3	G	GG->AG	369	TS	insertion	3
probabilistic	Crip3.0_scaffold563	287741	SNM	E1-3	T	TT->AT	198	TV	deletion	2
probabilistic	Crip3.0_scaffold135	163185	SNM	E1-4	A	AA->AG	189	TS	transitions	26
statistical	Crip3.0_scaffold360	374665	deletion	E1-4	AG	AG/A	16		transversions	19
probabilistic	Crip3.0_scaffold390	26404	SNM	E1-4	T	TT->AT	197	TV
probabilistic	Crip3.0_scaffold414	136110	SNM	E1-4	A	AA->AG	195	TS
probabilistic	Crip3.0_scaffold57	218623	SNM	E1-4	T	TT->AA	179	TV
probabilistic	Crip3.0_scaffold612	627192	SNM	E1-4	T	TT->CT	140	TS
probabilistic	Crip3.0_scaffold714	286099	SNM	E1-4	T	TT->CT	239	TS
probabilistic	Crip3.0_scaffold135	325490	SNM	E1-5	T	TT->GT	155	TV
statistical	Crip3.0_scaffold95	936746	SNM	E1-5	A	A/G	19	TS
probabilistic	Crip3.0_scaffold460	499077	SNM	E1-6	A	AA->AG	268	TS
statistical	Crip3.0_scaffold591	67761	SNM	E1-6	G	G/A	18	TS
statistical	Crip3.0_scaffold137	114361	SNM	E1-8	A	A/C	34	TV
statistical	Crip3.0_scaffold408	117437	insertion	E1-8	C	C/CA	21
probabilistic	Crip3.0_scaffold555	405991	SNM	E1-8	C	CC->CT	154	TS
probabilistic	Crip3.0_scaffold595	86874	SNM	E1-9	C	CC->CG	201	TV
probabilistic	Crip3.0_scaffold110	252582	SNM	E2-11	C	CC->TT	137	TS
probabilistic	Crip3.0_scaffold112	223272	SNM	E2-11	C	CC->AC	177	TV
probabilistic	Crip3.0_scaffold125	762459	SNM	E2-11	A	AA->AG	203	TS
probabilistic	Crip3.0_scaffold127	421248	SNM	E2-11	C	CC->GG	164	TV
probabilistic	Crip3.0_scaffold266	22228	SNM	E2-11	A	AA->AG	186	TS
probabilistic	Crip3.0_scaffold271	6046	SNM	E2-11	T	TT->CT	153	TS
probabilistic	Crip3.0_scaffold271	26118	SNM	E2-11	G	GG->GT	141	TV
probabilistic	Crip3.0_scaffold332	131946	SNM	E2-11	A	AA->AG	173	TS
statistical	Crip3.0_scaffold34	73975	SNM	E2-11	G	G/A	46	TS
probabilistic	Crip3.0_scaffold352	121078	SNM	E2-11	T	TT->CC	162	TS
probabilistic	Crip3.0_scaffold374	202531	SNM	E2-11	A	AA->AT	169	TV
probabilistic	Crip3.0_scaffold376	705955	SNM	E2-11	C	CT->AC	320	TV
probabilistic	Crip3.0_scaffold377	521168	SNM	E2-11	G	GG->AA	198	TS
probabilistic	Crip3.0_scaffold54	17400	SNM	E2-11	T	TT->AT	213	TV
statistical	Crip3.0_scaffold685	453770	SNM	E2-11	T	T/G	20	TV
probabilistic	Crip3.0_scaffold689	664617	SNM	E2-11	T	TT->GG	132	TV
probabilistic	Crip3.0_scaffold689	687387	SNM	E2-11	A	AA->AG	313	TS
probabilistic	Crip3.0_scaffold704	132255	SNM	E2-11	T	TT->CC	174	TS
probabilistic	Crip3.0_scaffold15	94947	SNM	E2-12	C	CC->CT	283	TS
probabilistic	Crip3.0_scaffold183	357676	SNM	E2-12	C	CC->CT	186	TS
statistical	Crip3.0_scaffold30	183123	SNM	E2-12	G	G/A	28	TS
probabilistic	Crip3.0_scaffold34	157350	SNM	E2-12	C	CC->CG	313	TV
probabilistic	Crip3.0_scaffold645	49008	SNM	E2-12	T	TT->AA	162	TV
probabilistic	Crip3.0_scaffold673	782753	SNM	E2-12	A	AA->AG	365	TV
statistical	Crip3.0_scaffold25	1121893	SNM	E2-13	A	A/G	26	TS
probabilistic	Crip3.0_scaffold324	407476	SNM	E2-13	T	TT->CT	209	TS
probabilistic	Crip3.0_scaffold640	136152	SNM	E2-13	A	AA->TT	225	TV
probabilistic	Crip3.0_scaffold129	651188	SNM	E2-14	A	AA->AT	168	TV
probabilistic	Crip3.0_scaffold163	23741	SNM	E2-14	G	GG->GT	139	TV
probabilistic	Crip3.0_scaffold229	159619	SNM	E2-14	T	TT->AT	176	TV
probabilistic	Crip3.0_scaffold660	23805	SNM	E2-14	T	TT->CC	163	TS
probabilistic	Crip3.0_scaffold679	8751	SNM	E2-14	T	TT->CT	177	TS
probabilistic	Crip3.0_scaffold105	151966	SNM	E2-3	T	TT->CC	151	TS
probabilistic	Crip3.0_scaffold125	72923	SNM	E2-3	T	TT->AT	260	TV
statistical	Crip3.0_scaffold145	239108	SNM	E2-3	G	G/A	33	TS
probabilistic	Crip3.0_scaffold165	280995	SNM	E2-3	G	GG->AA	218	TS
probabilistic	Crip3.0_scaffold17	489888	SNM	E2-3	A	AA->AG	187	TS
probabilistic	Crip3.0_scaffold211	582041	SNM	E2-3	A	AA->AC	366	TV
probabilistic	Crip3.0_scaffold81	350678	SNM	E2-3	T	TT->CT	154	TS
probabilistic	Crip3.0_scaffold170	222041	SNM	E2-4	T	TT->AA	128	TV
probabilistic	Crip3.0_scaffold369	339166	SNM	E2-4	C	CC->CT	179	TS
statistical	Crip3.0_scaffold518	99720	insertion	E2-4	G	G/GT	21
probabilistic	Crip3.0_scaffold646	169471	SNM	E2-4	G	GG->AG	174	TV
statistical	Crip3.0_scaffold9	528594	SNM	E2-4	A	A/G	41	TS
probabilistic	Crip3.0_scaffold93	56649	SNM	E2-4	T	TT->AT	192	TV
probabilistic	Crip3.0_scaffold101	1001093	SNM	E2-9	A	AA->GG	164	TS
probabilistic	Crip3.0_scaffold112	416469	SNM	E2-9	A	AA->TT	153	TV
probabilistic	Crip3.0_scaffold49	7115	SNM	E2-9	A	AA->AG	235	TS
probabilistic	Crip3.0_scaffold557	746168	SNM	E2-9	T	TT->CT	167	TS
statistical	Crip3.0_scaffold85	299407	deletion	E2-9	TG	TG/T	18
