# Supplementary material for: Temperature dependence of spontaneous mutation rates
Source: HighWire-hosted journal article supplement (doi:10.1101/gr.275168.120), 2021-07-23
Supplement: Supplemental_Data_2.xlsx [file Supplemental_Data_2.xlsx]

## Sheet: legend
Waldvogel & Pfenninger: Temperature dependence of spontaneous mutation rates
Supplemental Data 2: Details on mutation rate statistics
sheets
mutation rates	rates per temperature including high density intervals of Bayesian posterior distribution (HDI)
rate ratios	ratios of all pairwise comparisons acorss temperatures
polynomial regression	detailed test statistics of second order polynomial regression

## Sheet: mutation rates
mutation rates total				diploid			haploid
temperature	mutations	generational passages	mean callable sites	rate	lower 95% HDI	upper 95% HDI	rate	lower 95% HDI	upper 95% HDI
12	27	20	89200000	1.54e-08	9.8e-09	2.12e-08	7.7e-09	4.9e-09	1.06e-08
14	6	11	73300000	8.04e-09	2.51e-09	1.43e-08	4.02e-09	1.255e-09	7.15e-09
17	26	45	107000000	5.53e-09	3.47e-09	7.56e-09	2.765e-09	1.735e-09	3.78e-09
20	52	50	127000000	8.39e-09	6.24e-09	1.09e-08	4.195e-09	3.12e-09	5.45e-09
23	40	33	96000000	1.28e-08	8.97e-09	1.68e-08	6.4e-09	4.485e-09	8.4e-09
26	50	26	78700000	2.47e-08	1.77e-08	3.14e-08	1.235e-08	8.85e-09	1.57e-08
				5.53e-09			1.235e-08
mutation rates SNIs				diploid			haploid
temperature	mutations	generations	mean callable sites	rate	lower 95% HDI	upper 95% HDI	rate	lower 95% HDI	upper 95% HDI
12	4	20	89200000	2.52e-09	5.74e-10	4.92e-09	1.26e-09	2.87e-10	2.46e-09
14	1	11	73300000	1.85e-09	5.59e-12	4.8e-09	9.25e-10	2.795e-12	2.4e-09
17	6	45	107000000	1.35e-09	4.46e-10	2.4e-09	6.75e-10	2.23e-10	1.2e-09
20	10	50	127000000	1.71e-09	5.3e-10	2.77e-09	8.55e-10	2.65e-10	1.385e-09
23	3	33	96000000	1.09e-09	1.69e-10	2.28e-09	5.45e-10	8.45e-11	1.14e-09
26	5	26	78700000	2.7e-09	7.28e-10	4.97e-09	1.35e-09	3.64e-10	2.485e-09
mutation rates SNMs				diploid			haploid
temperature	mutations	generations	mean callable sites	rate	lower 95% HDI	upper 95% HDI	rate	lower 95% HDI	upper 95% HDI
12	23	20	89200000	1.32e-08	8.08e-09	1.85e-08	6.6e-09	4.04e-09	9.25e-09
14	5	11	73300000	6.84e-09	1.84e-09	1.25e-08	3.42e-09	9.2e-10	6.25e-09
17	20	45	107000000	4.25e-09	2.51e-09	6.15e-09	2.125e-09	1.255e-09	3.075e-09
20	42	50	127000000	6.71e-09	4.85e-09	8.94e-09	3.355e-09	2.425e-09	4.47e-09
23	37	33	96000000	1.18e-08	8.31e-09	1.59e-08	5.9e-09	4.155e-09	7.95e-09
26	45	26	78700000	2.23e-08	1.62e-08	2.91e-08	1.115e-08	8.1e-09	1.455e-08

## Sheet: rate ratios
Rate ratios (row/line)
	12	14	17	20	23
14	1.92
17	2.79	1.46
20	1.8	0.94	0.65
23	1.21	0.63	0.43	0.67
26	0.62	0.33	0.22	0.35	0.52
Support
above diagonal: %support (as in 1-%support < 1 < %support)
below diagonal: lower 95% HDI - upper 95% HDI
12	14	17	20	23	26
12	99.9	99.8	81.2	64.2	11.9
14	1.4-4.4	46.3	9.6	5.6	0.5
17	1.3-4.1	0.34-2.5	0.7	0.1	0
20	0.73-2.3	0.9-1.4	0.34-0.9	21.3	0.1
23	0.62-2.0	0.17-1.3	0.29-0.78	0.59-1.3	2.5
26	0.38-1.2	0.10-0.76	0.18-0.49	0.37-0.81	0.40-0.99

## Sheet: polynomial regressions
Test statistics of second order polynomial regressions
	mutation rate total	mutation rate SNI	mutation rate SNMs
Second order polynomial (quadratic)
Best-fit values
B0	4.584e-08	5.258e-09	4.236e-08		equation	Y=B0 + B1*X + B2*X^2
B1	-4.867e-09	-4.86e-10	-4.559e-09
B2	1.377e-10	1.276e-11	1.294e-10
95% CI (profile likelihood)
B0	3,096e-008 to 6,072e-008	3,122e-010 to 1,020e-008	3,325e-008 to 5,147e-008
B1	-6,519e-009 to -3,216e-009	-1,035e-009 to 6,287e-011	-5,570e-009 to -3,549e-009
B2	9,433e-011 to 1,811e-010	-1,663e-012 to 2,718e-011	1,028e-010 to 1,559e-010
Goodness of Fit
Degrees of Freedom	3	3	3
R squared	0.9795	0.7262	0.9914
Adjusted R squared	0.9658	0.5436	0.9857
Sum of Squares	1.249e-18	1.38e-19	4.679e-19
chi2	4.16333e-19	4.6e-20	1.55967e-19
Sy.x	6.453e-10	2.145e-10	3.949e-10
AICc	-210.1	-223.3	-216
Runs test
Points above curve	3	2	2
Points below curve	3	4	4
Number of runs	5	4	4
P value (runs test)	0.9	0.8	0.8
Deviation from Model	Not Significant	Not Significant	Not Significant
Number of points
# of X values	6	6	6
# Y values analyzed	6	6	6
